# Supplementary material for: Diffusion‐weighted MRI and intravoxel incoherent motion model for diagnosis of pediatric solid abdominal tumors
Source: PubMed Central journal article supplement (PMC6001424; doi:10.1002/jmri.25901), 2017-11-21
Supplement: JMRI-47-1475-s001.pdf [file JMRI-47-1475-s001.pdf]

Supplementary Table S1. Comparison of benign ( $n = 10$ ) and malignant ( $n = 32$ ) lesions with ADC,  $D$ ,  $D^*$  and  $f$  histogram parameters.

| Parameter                   | Mann-Whitney test |        |        |       |
|-----------------------------|-------------------|--------|--------|-------|
|                             | ADC               | $D$    | $D^*$  | $f$   |
| Mean                        | 0.007*            | 0.070  | 0.127  | 0.390 |
| Median                      | 0.001*            | 0.049* | 0.039* | 0.320 |
| 5 <sup>th</sup> percentile  | 0.005*            | 0.056  | 0.135  | 0.919 |
| 25 <sup>th</sup> percentile | 0.002*            | 0.045* | 0.092  | 0.248 |
| 75 <sup>th</sup> percentile | 0.007*            | 0.052  | 0.127  | 0.494 |
| 90 <sup>th</sup> percentile | 0.202             | 0.112  | 0.259  | 0.760 |
| Kurtosis                    | < 0.001*          | 0.740  | 0.247  | 0.631 |
| Skewness                    | < 0.001*          | 0.018* | 0.647  | 0.122 |
| Entropy                     | 0.036*            | 0.081  | 0.002* | 0.965 |

Note: \* indicates  $P$  value of a significant difference.

Supplementary Table S2. Comparison of benign ( $n = 10$ ) and malignant ( $n = 32$ ) lesions with ADC,  $D$ ,  $D^*$  and  $f$  histogram parameters with ROC analysis results.

| Parameters          | Mean                | Median       | 5 <sup>th</sup> % | 25 <sup>th</sup> % | 75 <sup>th</sup> % | 90 <sup>th</sup> % | Kurtosis     | Skewness     | Entropy               |              |
|---------------------|---------------------|--------------|-------------------|--------------------|--------------------|--------------------|--------------|--------------|-----------------------|--------------|
| ADC                 | AUC                 | 0.781        | 0.825             | 0.788              | 0.819              | 0.778              | 0.638        | 0.875        | 0.919                 | 0.722        |
|                     | Confidence interval | 0.601, 0.962 | 0.659, 0.991      | 0.488, 0.987       | 0.646, 0.992       | 0.610, 0.946       | 0.439, 0.836 | 0.738, 1.000 | 0.823, 1.000          | 0.513, 0.931 |
|                     | Sensitivity %       | 70.0         | 80.0              | 70.0               | 70.0               | 70.0               | 90.0         | 80.0         | 70.0                  | 60.0         |
|                     | Specificity %       | 87.5         | 81.3              | 90.6               | 93.7               | 81.2               | 43.7         | 93.7         | 100                   | 87.5         |
|                     | $P$ value           | 0.008*       | 0.002*            | 0.007*             | 0.003*             | 0.009*             | 0.194        | <0.001*      | <0.001*               | 0.036*       |
|                     | Cutoff              | 1439         | 1219              | 951                | 1310               | 1565               | 1605         | 2.10         | $3.30 \times 10^{-2}$ | 6.55         |
|                     | $D$                 | AUC          | 0.700             | 0.717              | 0.710              | 0.721              | 0.714        | 0.677        | 0.539                 | 0.758        |
| Confidence interval |                     | 0.451, 0.950 | 0.458, 0.977      | 0.451, 0.970       | 0.459, 0.983       | 0.487, 0.941       | 0.471, 0.883 | 0.296, 0.782 | 0.495, 1.000          | 0.493, 0.894 |
| Sensitivity %       |                     | 66.7         | 66.7              | 77.8               | 66.7               | 66.7               | 88.9         | 33.3         | 77.8                  | 77.8         |
| Specificity %       |                     | 84.8         | 87.9              | 27.7               | 90.9               | 81.8               | 51.5         | 90.9         | 87.9                  | 66.7         |
| $P$ value           |                     | 0.068        | 0.048*            | 0.055              | 0.045*             | 0.052              | 0.108        | 0.724        | 0.019*                | 0.078        |
| Cutoff              |                     | 1232         | 1242              | 587                | 1117               | 1375               | 1421         | 1.93         | $3.56 \times 10^{-2}$ | 6.98         |
| $D^*$               |                     | AUC          | 0.681             | 0.736              | 0.681              | 0.701              | 0.681        | 0.639        | 0.628                 | 0.569        |
|                     | Confidence interval | 0.442, 0.919 | 0.528, 0.945      | 0.481, 0.880       | 0.495, 0.907       | 0.435, 0.926       | 0.387, 0.891 | 0.383, 0.874 | 0.342, 0.797          | 0.711, 0.969 |
|                     | Sensitivity %       | 55.6         | 55.6              | 88.9               | 66.7               | 55.6               | 44.4         | 55.6         | 77.8                  | 88.9         |
|                     | Specificity %       | 87.5         | 93.8              | 46.9               | 81.2               | 87.5               | 90.6         | 90.6         | 46.9                  | 75.0         |
|                     | $P$ value           | 0.101        | 0.032*            | 0.101              | 0.068              | 0.101              | 0.208        | 0.244        | 0.529                 | 0.002*       |
|                     | Cutoff              | 13700        | 11104             | 5206               | 8473               | 16642              | 23690        | 2.19         | $7.61 \times 10^{-3}$ | 9.32         |
|                     | $f$                 | AUC          | 0.594             | 0.605              | 0.513              | 0.625              | 0.573        | 0.534        | 0.553                 | 0.666        |
| Confidence interval |                     | 0.372, 0.815 | 0.368, 0.841      | 0.291, 0.734       | 0.392, 0.858       | 0.354, 0.793       | 0.325, 0.744 | 0.369, 0.737 | 0.470, 0.861          | 0.303, 0.710 |
| Sensitivity %       |                     | 40.0         | 40.0              | 30.0               | 40.0               | 70.0               | 60.0         | 80.0         | 90.0                  | 70.0         |
| Specificity %       |                     | 87.5         | 93.7              | 93.7               | 87.5               | 59.4               | 62.5         | 50.0         | 46.9                  | 53.1         |
| $P$ value           |                     | 0.376        | 0.323             | 0.906              | 0.238              | 0.488              | 0.745        | 0.616        | 0.118                 | 0.953        |
| Cutoff              |                     | 22.7         | 19.5              | 5.50               | 10.5               | 21.5               | 36.0         | 2.18         | $2.06 \times 10^{-1}$ | 3.52         |

Note: \* indicates  $P$  value of a significant difference. AUC is the area under the ROC curve. The units for mean, median and percentiles of ADC,  $D$  and  $D^*$  cutoff values are in  $\times 10^{-6}$  mm<sup>2</sup>/s and  $f$  as a percentage (%).
